# Supplementary figures and images for: Diastereomeric separations and crystal structures of rhodium(iii) and iridium(iii) complexes containing adenosine and related nucleosidesElectronic supplementary information (ESI) available: 1H NMR and CD spectra. See http://www.rsc.org/suppdata/dt/b2/b209148h/
Source: Royal Society of Chemistry journal article supplement (doi:10.1039/b209148h), 2002-12-23

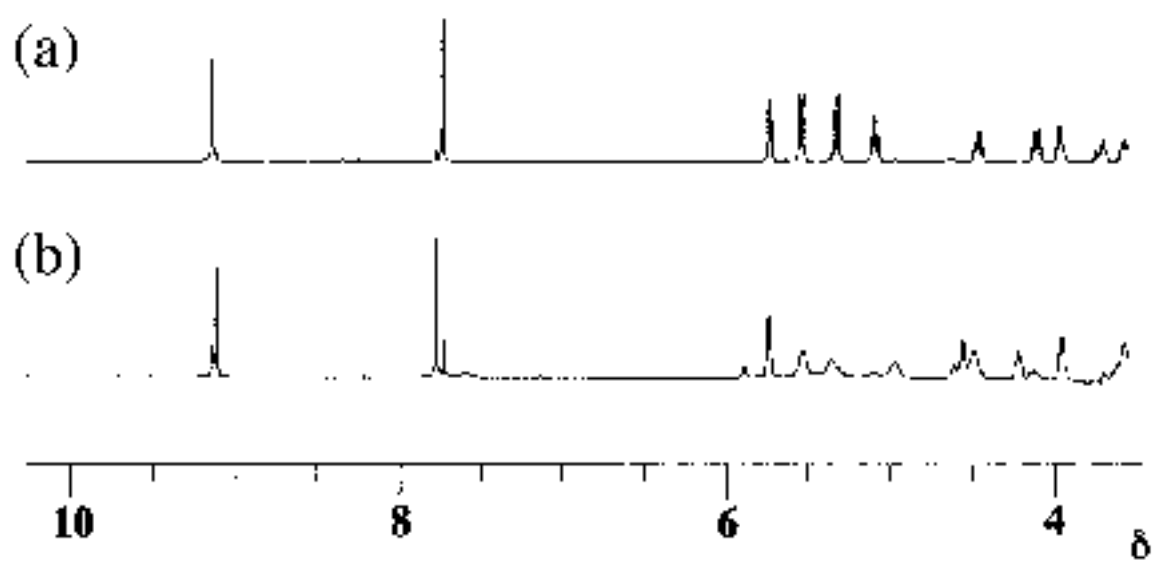

Supplement: fs1.pdf [file fs1.pdf]

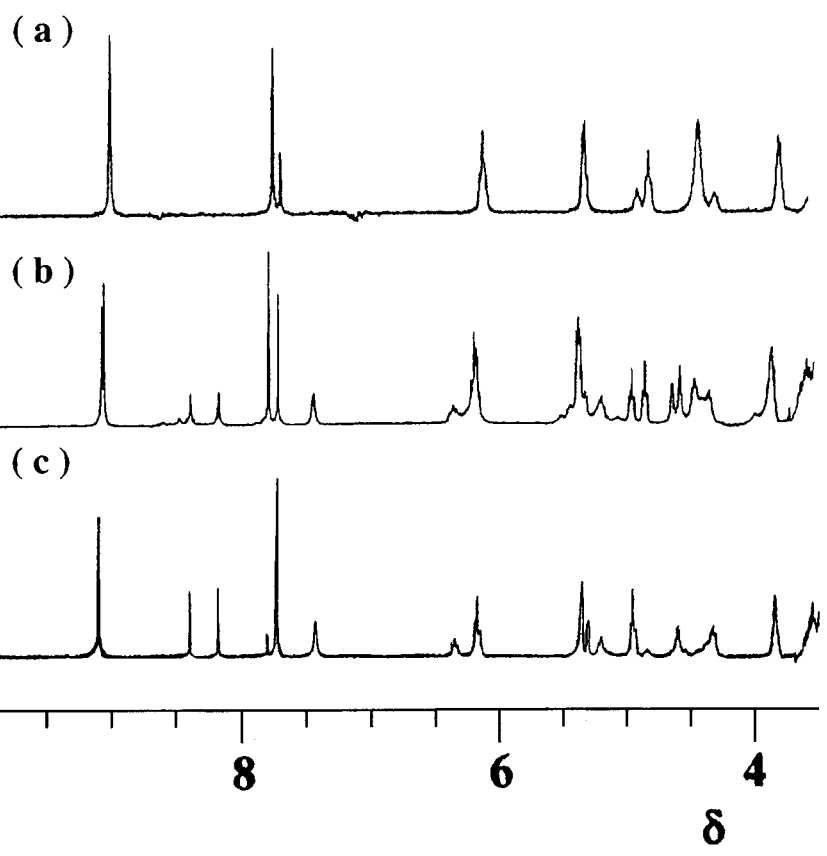

Supplement: fs2.pdf [file fs2.pdf]

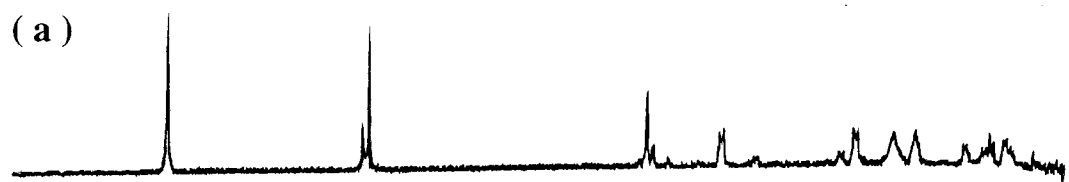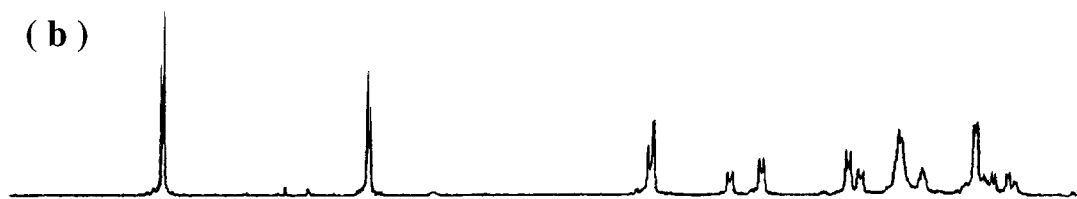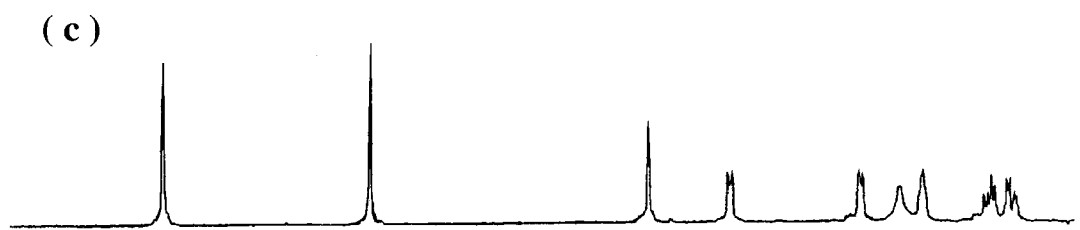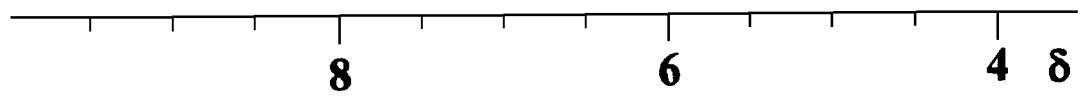

Supplement: fs3.pdf [file fs3.pdf]

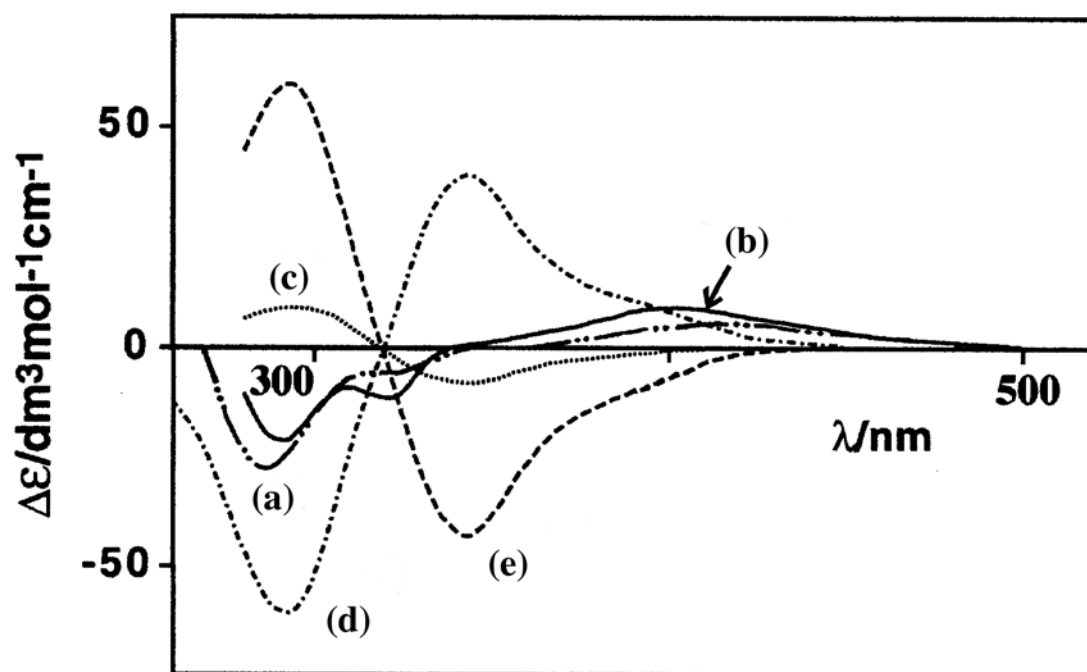

Supplement: fs4.pdf [file fs4.pdf]
